# Supplementary material for: The decline of malaria in Vietnam, 1991–2014
Source: Malar J. 2018 Jun 7;17:226. doi: 10.1186/s12936-018-2372-8 (PMC5992833; doi:10.1186/s12936-018-2372-8)
Supplement: Supplementary file 2 — Additional file 2. Additional methods and tables. [file 12936_2018_2372_MOESM2_ESM.pdf]

## Additional File 2

Data on the use of anti-malarial drugs were contained in these reports in the form of requests placed by provincial malaria control programmes to NIMPE for anti-malarial drugs based on projected need for the subsequent year (Table S1). Requests for anti-malarial drugs likely capture true anti-malarial drug usage in the country because all public hospitals and health centers in Vietnam provide anti-malarial drugs free of charge to individuals suspected of having malaria [24, 35]. This study looked at treatments for falciparum malaria only because the vast majority of suspected malaria cases were not confirmed by blood-smear for the first half of the time series, and unconfirmed cases were typically presumed to be *P. falciparum* and treated as such. In a setting where all suspected malaria is confirmed as *P. falciparum* or *P. vivax*, artemisinin would only act to reduce falciparum transmission; however, when the majority of cases are unconfirmed, the presumption of falciparum and treatment with artemisinins will act to reduce onward transmission of both falciparum and vivax. Treatment guidelines used to convert drug units ordered to drug courses ordered are shown in Table S2.

Table S1

Anti-malarial drugs available in Vietnam, 1991-2014

| Drug                                   | Unit Weight                                                                                       | Years Requested                               |
|----------------------------------------|---------------------------------------------------------------------------------------------------|-----------------------------------------------|
| DHA-PPQ                                | 40 mg DHA/ 320 mg Piperaquine                                                                     | 2007-2014                                     |
| CV8                                    | 32 mg DHA/ 320mg PPQ/ 90 mg trimethoprim/ 5 mg primaquine                                         | 2001-2006                                     |
| Artemisinin                            | 250 mg                                                                                            | 1992-2003                                     |
| Artesunate                             | 50 mg                                                                                             | 1992-2008                                     |
| Artesunate Injection                   | 60 mg                                                                                             | 1994-2014                                     |
| Quinine sulfate (oral use)             | 250 mg                                                                                            | 1992-2001; 2004-2005;<br>2007-2008; 2011-2014 |
| Quinine hydrochloride (IM injection)   | 500 mg                                                                                            | 1992-2001; 2004-2005                          |
| Quinine dihydrochloride (IV injection) | 500 mg                                                                                            | 1992-1995                                     |
| Primaquine                             | 13.2 mg                                                                                           | 1992-2014                                     |
| Chloroquine                            | 250 mg                                                                                            | 1992-2014                                     |
| Mefloquine                             | 250 mg                                                                                            | 1994-1997; 1999- 2002                         |
| SR2                                    | 500 mg Sulfadoxine/ 25 mg Pyrimethamine                                                           | 1992-2003                                     |
| SR3                                    | combination therapy based on Sulfadoxine or Sulfadimethoxin<br>(rarely ordered, and only in 1992) | 1992                                          |
| Fansidar Injection                     | 400mg Sulfadoxine/ 20mg Pyrimethamine 2.0 mL                                                      | 1995                                          |

*Note.* DHA = Dihydroartemisinin; IM = Intramuscular; IV = Intravenous

## Additional File 2 (continued)

Table S2

## Treatment Guidelines for Malaria in Adults

| Guidelines prior to 2003                                            | Drug (Avg. units per total treatment course)                                                                                                           |
|---------------------------------------------------------------------|--------------------------------------------------------------------------------------------------------------------------------------------------------|
| Uncomplicated <i>P. falciparum</i>                                  | Chloroquine (8 tablets) + Primaquine (4 tablets)                                                                                                       |
| Uncomplicated <i>P. falciparum</i><br>(with chloroquine resistance) | Fansidar (3 tubes)<br>OR Fansidar (3 tubes) + Quinine (42 tablets)<br>OR Quinine (42 tablets) + Tetracycline (28 tablets)<br>OR Mefloquine (3 tablets) |
| Severe <i>P. falciparum</i>                                         | OR Artemisinin (16 tablets, 7 days) + Primaquine (4 tablets)<br>Artesunate Injection (4-8 tubes)                                                       |
| <i>P. vivax</i>                                                     | OR Quinine hydrochloride (IM route) (21 tubes)<br>Chloroquine (8 tablets) + Primaquine (20 tablets)                                                    |
| Guidelines issued June 2003 and January 2007                        |                                                                                                                                                        |
| Uncomplicated <i>P. falciparum</i>                                  | Artesunate (16 tablets) + Primaquine (4 tablets)<br>OR CV8 (8 tablets) OR DHA-PPQ (8 tablets)                                                          |
| Uncomplicated <i>P. falciparum</i><br>(in 1st trimester pregnancy)  | Quinine (42 tablets)                                                                                                                                   |
| Severe <i>P. falciparum</i>                                         | Artesunate Injection (2-9 tubes with switch to oral)                                                                                                   |
| <i>P. vivax</i>                                                     | Chloroquine (10 tablets) + Primaquine (20 tablets)                                                                                                     |
| Guidelines issued November 2009                                     |                                                                                                                                                        |
| Uncomplicated <i>P. falciparum</i>                                  | DHA-Piperaquine (8 tablets) + Primaquine (4 tablets)                                                                                                   |
| Uncomplicated <i>P. falciparum</i><br>(in 1st trimester pregnancy)  | Quinine (42 tablets) + Clindamycin (14 tablets)                                                                                                        |
| Severe <i>P. falciparum</i>                                         | Artesunate Injection (4-10 tubes with switch to oral)                                                                                                  |
| <i>P. vivax</i>                                                     | Chloroquine (10 tablets) + Primaquine (28 tablets)                                                                                                     |
